# Supplementary material for: Integration detection of mercury(ii) and GSH with a fluorescent “on-off-on” switch sensor based on nitrogen, sulfur co-doped carbon dots
Source: Royal Society of Chemistry journal article supplement (doi:10.1039/d1ra08890d), 2022-01-01
Supplement: d1ra08890d1.pdf [file d1ra08890d1.pdf]

# Supporting Information

## Integration detection of mercury(II) and GSH with fluorescent "on-off-on" switch sensor based on nitrogen, sulfur co-doped carbon dots

Haiyan Qi<sup>a\*</sup>, Xiaona Sun<sup>a</sup>, Jinlong Li<sup>b</sup>, Jun Li<sup>c</sup>, Xiuwen Wang<sup>a</sup>

<sup>a</sup>*College of Chemistry and Chemical Engineering, Qiqihar University, No. 42, Wenhua Street, Qiqihar, 161006, P. R. China.*

<sup>b</sup>*Key Laboratory of Fine Chemicals of College of Heilongjiang Province, Qiqihar University, No. 42, Wenhua Street, Qiqihar, 161006, P. R. China.*

<sup>c</sup>*Heilongjiang Industrial Hemp Processing Technology Innovation Center, Qiqihar University, No. 42, Wenhua Street, Qiqihar, 161006, P. R. China.*

*\* Corresponding authors: Haiyan Qi*

*Tel.: +86-452-2738214*

*E. mail: qhy120@sina.com*

## Materials

Citric acid, taurine and L-glutathione reduced GSH were acquired from Aladdin Chemical Reagent Co., Ltd (Shanghai, China). KCl, MgCl<sub>2</sub>, CuSO<sub>4</sub>, CaCl<sub>2</sub>, NaCl, MnSO<sub>4</sub>, SrCl<sub>2</sub>, CdSO<sub>4</sub>, HgCl<sub>2</sub>, PbSO<sub>4</sub>, ZnCl<sub>2</sub>, NiSO<sub>4</sub>, AlCl<sub>3</sub>, Fe<sub>2</sub>(SO<sub>4</sub>)<sub>3</sub> and FeSO<sub>4</sub> were acquired from Tianjin Kaitong Chemical Reagent Co., Ltd (Tianjin, China). Sodium hydroxide was purchased from Macklin Biochemical Co., Ltd (Shanghai, China). Hydrochloric acid was purchased from Liaoning Quanrui Reagent Co., Ltd Beijing chemical plant (Beijing, China). Dialysis bags (retained molecular weight 500 Da) were enrolled from Yi Bo Biological (Beijing, China). Ultrapure water was used throughout whole experiments.

## Apparatus and characterizations of NS-CDs

Transmission electron microscopy (HRTEM) images were captured through JEM-2100F electron microscope (JEOL, Japan). X-ray diffraction (XRD) was performed on D8 focus type (BRUKER-AXS, Germany). Fourier transform infrared (FTIR) spectrum was characterized by NICOLET 380 (Thermo, USA). Fluorescence spectra were recorded on RF-5301PC fluorescence spectrophotometer (Shimadzu, Japan). UV-vis absorption spectra were acquired on TU-1901 UV-visible spectrophotometer (Purkinje, China). Fluorescence lifetimes were recorded on FLUOROMAX-4 high sensitivity fluorescence spectrometer (HORIBA, USA). X-ray photoelectron spectroscopy (XPS) was characterized by ESCALAB250xi X-ray photoelectron spectrometer (Thermo, USA).

The fluorescent QY of NS-CDs was calculated by the following formula:

$$\Phi_x = \Phi_s \frac{I_x}{I_s} \cdot \frac{A_s}{A_x} \cdot \left( \frac{\eta_x}{\eta_s} \right)^2$$

where  $\Phi_s$  was the QY of quinine sulfate (54%);  $I_x$  and  $I_s$  were the fluorescence intensity of NS-CDs and quinine sulfate, respectively;  $A_x$  and  $A_s$  were the UV-Vis absorption of NS-CDs and quinine sulfate;  $\eta$  was the refractive index.

## Synthesis of NS-CDs

Firstly, the mixture of 2 g citric acid and 1 g taurine was heated in oven at 200 °C for 15 min to a molten state. After being cooled down to room temperature, the obtained sample was mixed with sodium hydroxide solution (250 mL, 10 mM). Then, the pH of the mixed solution was adjusted to 7.0 by hydrochloric acid solution. Next,

the solution was filtrated by 0.22  $\mu\text{m}$  filtermembrane and then dialyzed through a dialysis bag (molecular weight cut-off is 500 Da) against ultrapure water for 60 h for the final solution in the dialysis bag. Finally, the solid NS-CDs were obtained after vacuum freeze drying the final solution for 24 h.

### ***Detection of $\text{Hg}^{2+}$ and GSH***

All the fluorescence measurements were implemented at room temperature. In the  $\text{Hg}^{2+}$  detection experiment, the concentrations of  $\text{Hg}^{2+}$  ions ranged from 0 to 100  $\mu\text{M}$  after the  $\text{Hg}^{2+}$  solution was added into the aqueous NS-CDs solutions (2 mL). Then, the fluorescence spectra of the mixed solutions were recorded (excited at 345 nm) after these solutions stood for 5 min. In regard to the sensitivity of GSH to the NS-CDs- $\text{Hg}^{2+}$ , the concentrations of GSH ranged from 0 to 85  $\mu\text{M}$  in the mixed solutions, and the fluorescence spectra of the mixed solutions were recorded under the same condition as above. The concentration of GSH in fetal bovine serum samples is calculated using the calibration curve obtained. The fetal bovine serum was obtained from Qiqihar Medical University, which have been treated as previously reported<sup>[1]</sup> without further dilution.

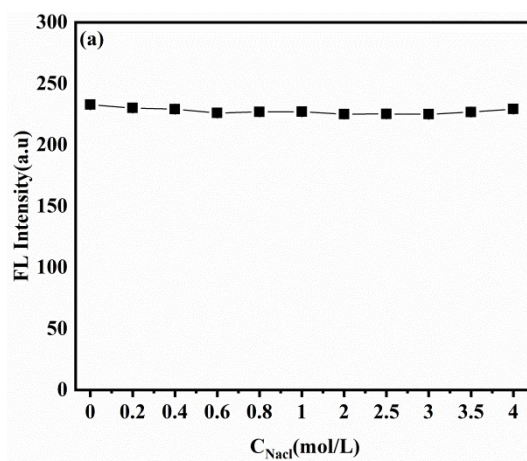

Fig.S1. Fluorescence intensities of NS-CDs in different concentration of NaCl.

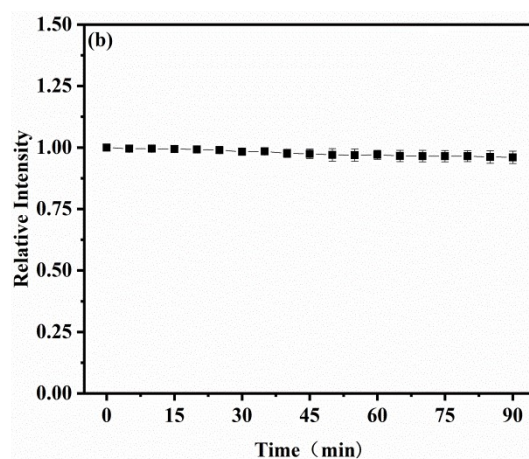

Fig.S2. Fluorescence intensities of NS-CDs during continuous UV light irradiation.

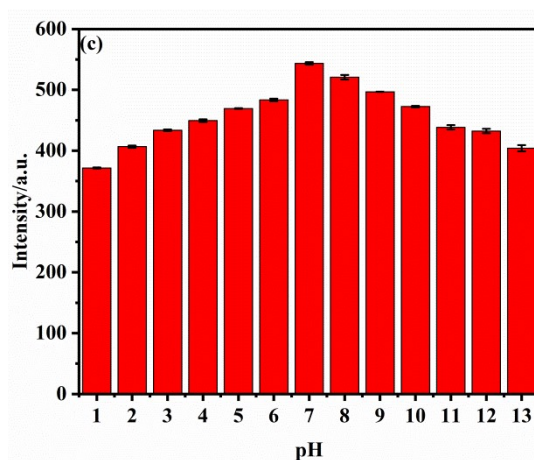

Fig.S3. Fluorescence intensities of NS-CDs at different pH.

Table S1 Detection of  $Hg^{2+}$  in tap water

| Sample    | Initial/ $\mu M$ | Added/ $\mu M$ | Founded / $\mu M$ | Recovery (%) | RSD (%) |
|-----------|------------------|----------------|-------------------|--------------|---------|
| Tap water | 0                | 2              | 1.88              | 94.0         | 3.4     |
|           |                  | 4              | 3.96              | 97.8         | 2.0     |
|           |                  | 8              | 8.42              | 105.2        | 2.8     |

Table S2 Detection of GSH in fetal bovine serum

| Sample             | Initial/ $\mu M$ | Added/ $\mu M$ | Founded / $\mu M$ | Recovery (%) | RSD (%) |
|--------------------|------------------|----------------|-------------------|--------------|---------|
| Fetal bovine serum | 0.35             | 2              | 2.40              | 102.5        | 2.4     |
|                    |                  | 4              | 4.36              | 100.3        | 1.6     |
|                    |                  | 8              | 8.22              | 98.4         | 1.2     |

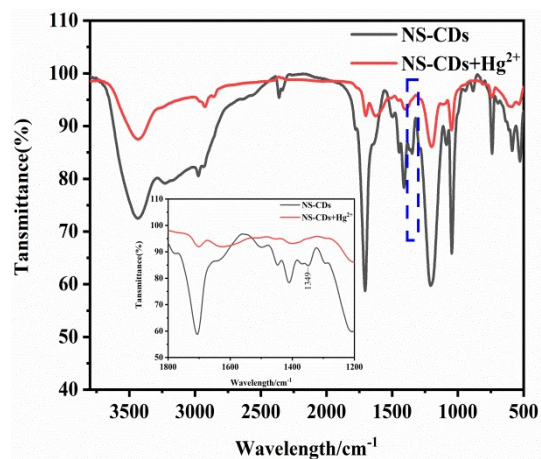

Fig.S4. FTIR spectra of NS-CDs and NS-CDs+Hg<sup>2+</sup>

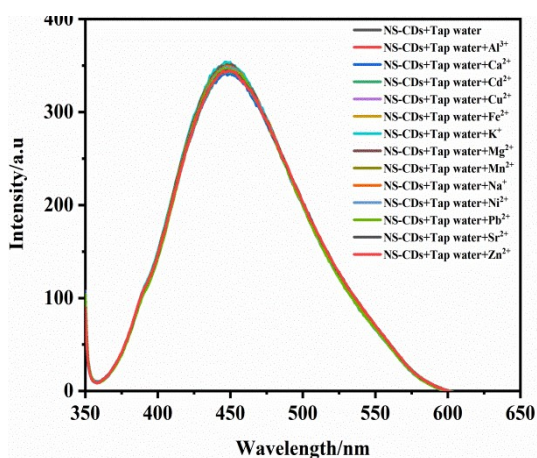

Fig.S5 Interferences experiment of common ions in tap water

[1] H.D. Zhang, S.F. Wu, Z.H. Xing, H.B. Wang, *Analyst*, 2021, **146**, 7250-7256.
